# Supplementary material
Source: PubMed Central journal article supplement (PMC5898430)

A

|       | t(3;3) | t(17;20) | t(1;1) | t(5;5) | t(10;6) | t(11;11)b | t(6;6) | t(17;16) | t(12;12) | t(3;3)b | t(1;19) | t(16;17) | t(2;5) | t(10;19) |
|-------|--------|----------|--------|--------|---------|-----------|--------|----------|----------|---------|---------|----------|--------|----------|
| GPS1  | -      | -        | -      | -      | -       | -         | -      | -        | -        | -       | -       | -        | -      | -        |
| GPS2  | -      | -        | -      | -      | -       | -         | -      | +TF      | -        | -       | -       | -        | -      | -        |
| GPS3  | -      | -        | -      | -      | -       | -         | -      | -        | -        | -       | -       | -        | -      | -        |
| GPS4  | -      | -        | -      | -      | -       | -         | -      | -        | -        | -       | -       | -        | -      | -        |
| GPS5  | -      | -        | -      | -      | TF+     | -         | -      | -        | -        | -       | -       | -        | -      | -        |
| GPS6  | -      | -        | -      | -      | -       | -         | -      | -        | -        | -       | -       | -        | -      | -        |
| GPS7  | +      | -        | -      | -      | -       | +TF       | -      | -        | -        | -       | -       | -        | -      | -        |
| GPS8  | -      | +        | +      | -      | -       | -         | +      | -        | -        | +       | -       | -        | -      | -        |
| GPS9  | -      | -        | -      | -      | -       | -         | -      | -        | -        | +       | -       | -        | -      | -        |
| GPS10 | -      | -        | -      | -      | -       | -         | -      | -        | -        | -       | -       | -        | -      | -        |
| GPS11 | -      | -        | -      | +      | -       | -         | -      | -        | -        | -       | -       | -        | -      | -        |
| GPS12 | -      | -        | -      | -      | -       | -         | -      | -        | -        | -       | -       | -        | -      | -        |
| GPS50 | -      | -        | -      | -      | -       | -         | -      | -        | -        | -       | +       | -        | -      | -        |
| GPS51 | -      | -        | -      | -      | -       | -         | -      | -        | -        | -       | -       | TF+TF    | -      | -        |
| GPS52 | -      | -        | -      | -      | -       | -         | -      | -        | -        | -       | -       | -        | +      | -        |
| GPS53 | -      | -        | -      | -      | -       | -         | -      | -        | -        | -       | -       | -        | +      | -        |
| GPS54 | -      | -        | -      | -      | -       | -         | -      | -        | -        | -       | -       | -        | -      | TF+      |

B

ROS1\_207569\_at

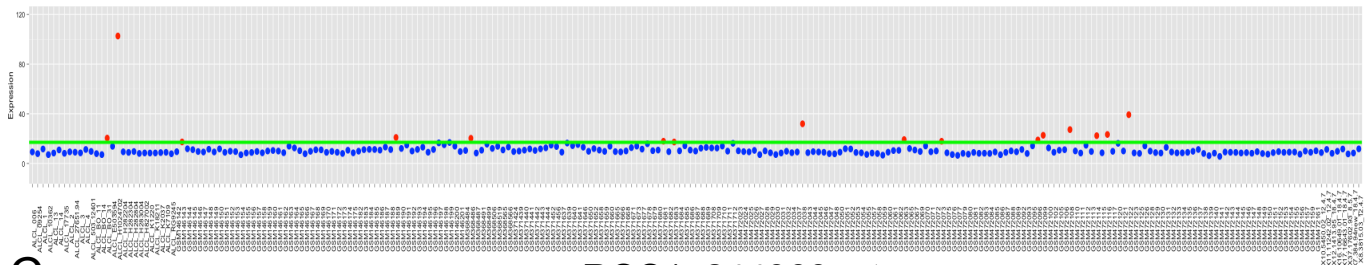

C

ROS1\_244363\_at

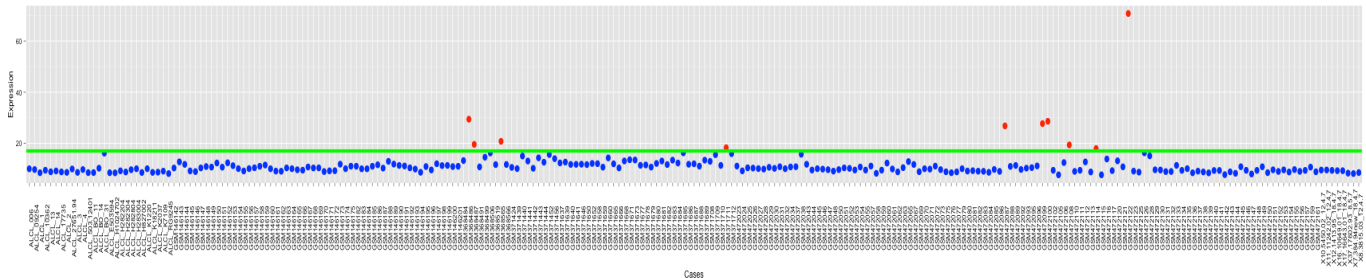

D

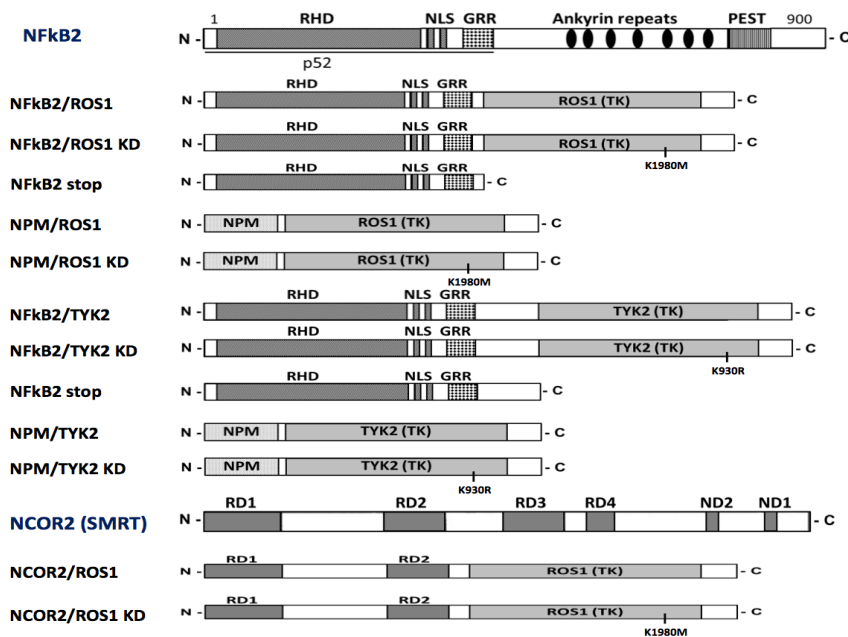

Supplement: NIHMS952969-supplement-Supl_figure_5.pdf [file NIHMS952969-supplement-Supl_figure_5.pdf]
