# Supplementary material
Source: PubMed Central journal article supplement (PMC5898430)
Supplement: NIHMS952969-supplement-Supl_figure_3.pdf [file NIHMS952969-supplement-Supl_figure_3.pdf]

**A**

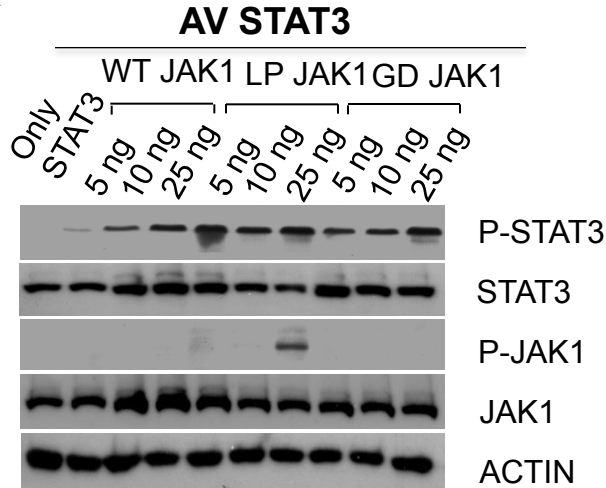

**B**

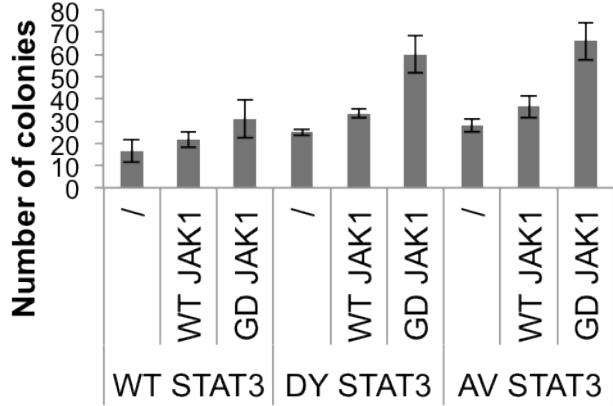

**C**

|                   | JAK1 WT | JAK1 GD | JAK1 GD - JAK1 WT |
|-------------------|---------|---------|-------------------|
| STAT3 WT          | 16.5    | 31      | 14.5              |
| STAT3 DY          | 25      | 60      |                   |
| STAT3 DY-STAT3 WT | 8.5     |         |                   |

Expected DY STAT3/GD JAK1= 16.5 + 8.5 + 14.5 = 39.5

Counted Colony = 60, 52% more than expected

**D**

|                     | JAK1 WT* | JAK1 GD | JAK1 GD - JAK1 WT |
|---------------------|----------|---------|-------------------|
| STAT3 WT            | 21.5     | 31      | 9.5               |
| STAT3 DY            | 33.5     | 60      |                   |
| STAT3 DY - STAT3 WT | 12       |         |                   |

Expected DY STAT3/GD JAK1= 21.5 + 12 + 9.5 = 43

Counted Colony = 60, 40% more than expected

**E**

|                     | JAK1 WT | JAK1 GD | JAK1 GD - JAK1 WT |
|---------------------|---------|---------|-------------------|
| STAT3 WT            | 16.5    | 31      | 14.5              |
| STAT3 AV            | 28      | 66      |                   |
| STAT3 AV - STAT3 WT | 11.5    |         |                   |

Expected AV STAT3/GD JAK1= 16.5 + 11.5 + 14.5 = 42.5

Counted Colony = 66, 55% more than expected

**F**

|                     | JAK1 WT* | JAK1 GD | JAK1 GD - JAK1 WT |
|---------------------|----------|---------|-------------------|
| STAT3 WT            | 21.5     | 31      | 9.5               |
| STAT3 AV            | 36.5     | 66      |                   |
| STAT3 AV - STAT3 WT | 15       |         |                   |

Expected AV STAT3/ GD JAK1= 21.5 + 15 + 9.5 = 46

Counted Colony = 66, 43% more than expected
