# Supplementary material
Source: PubMed Central journal article supplement (PMC5898430)

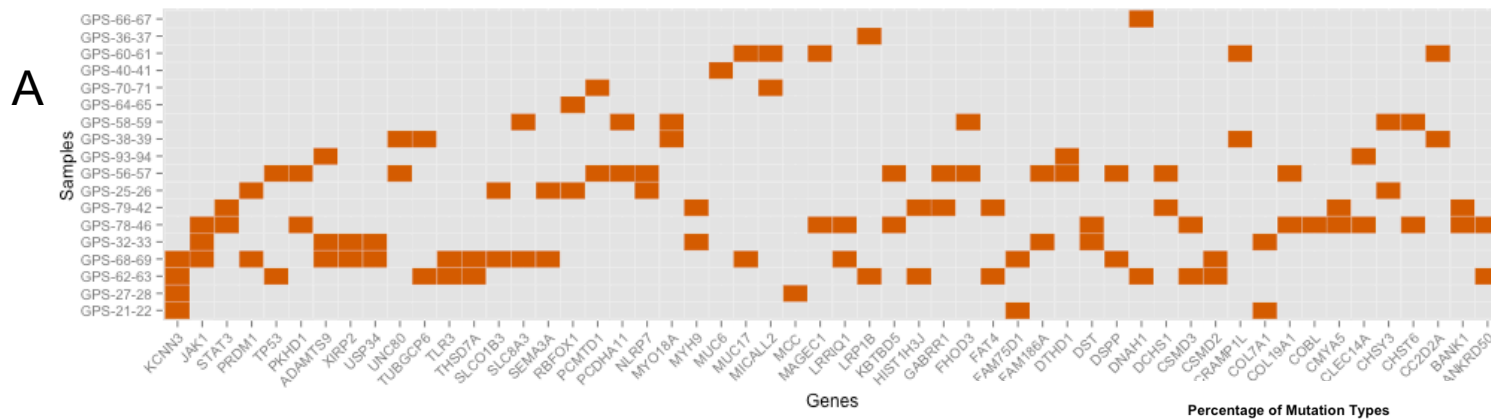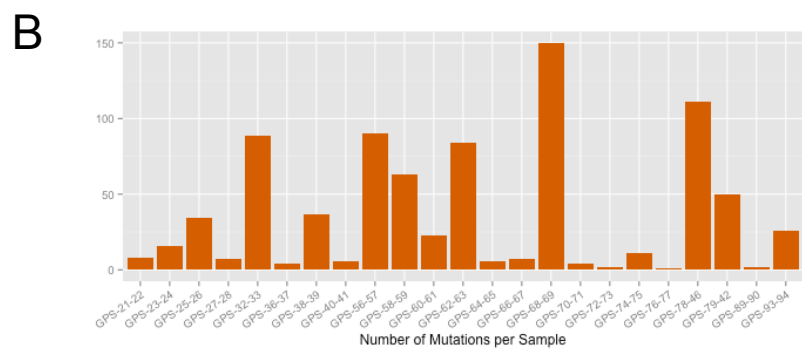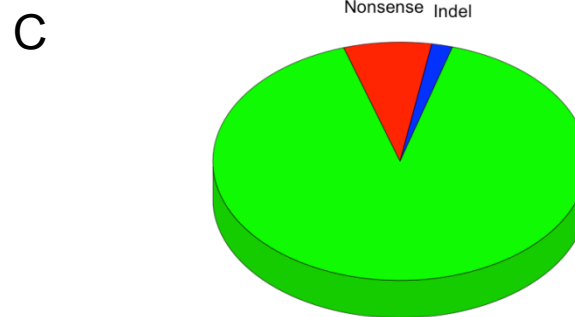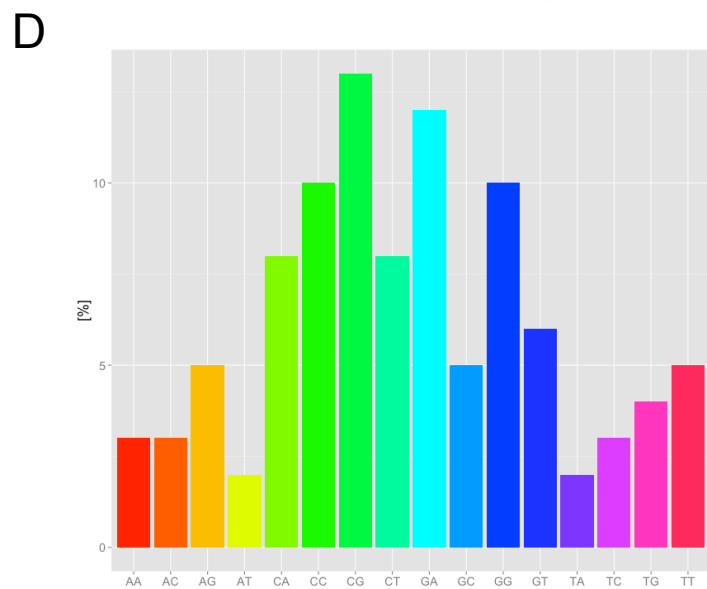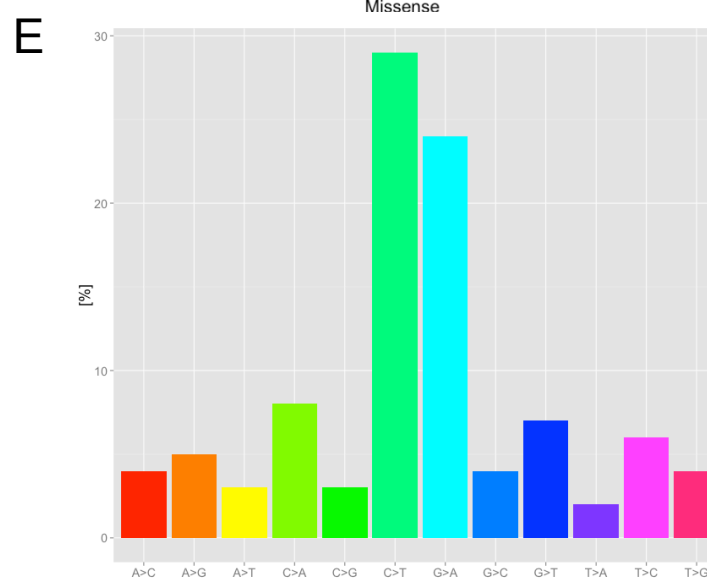

Supplement: NIHMS952969-supplement-Supl_figure_1.pdf [file NIHMS952969-supplement-Supl_figure_1.pdf]

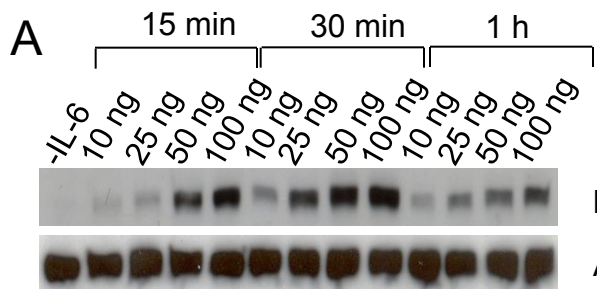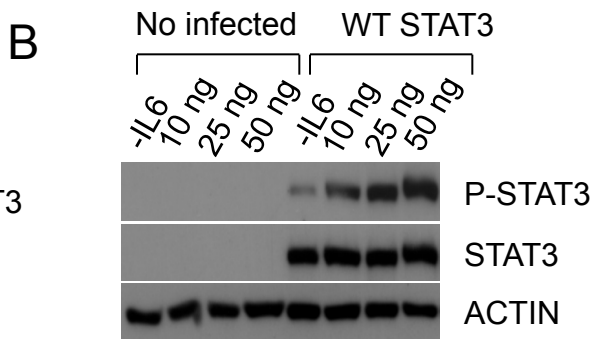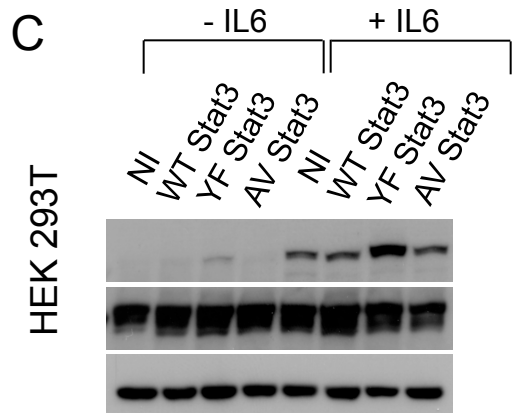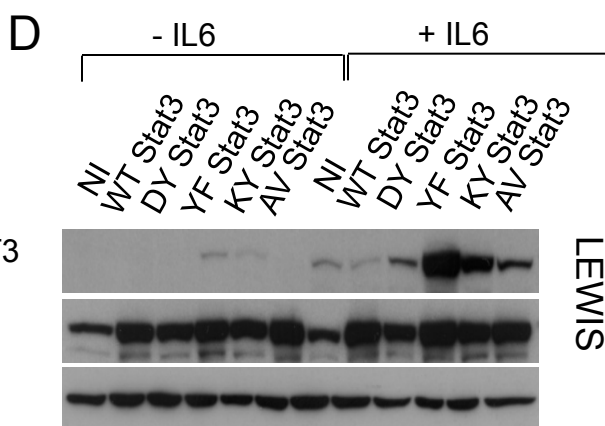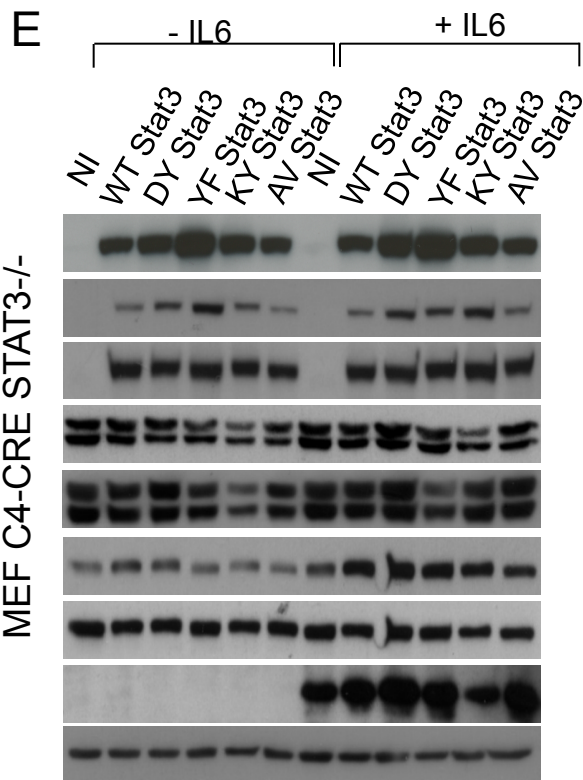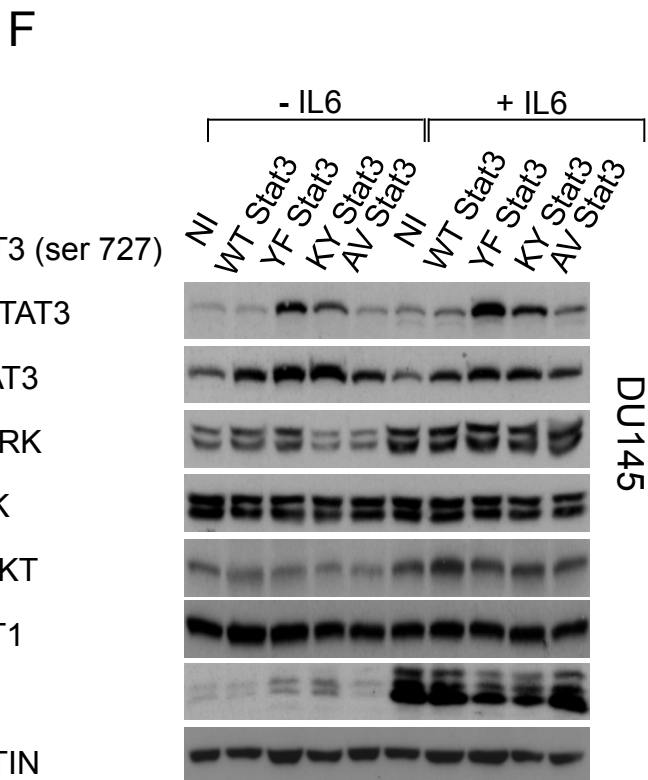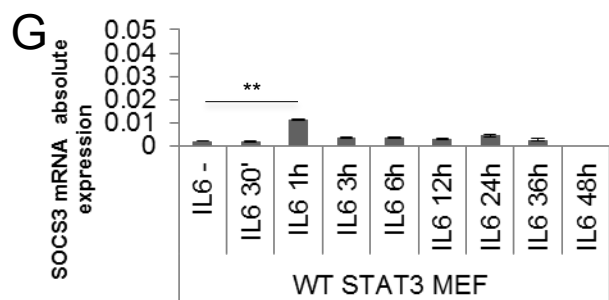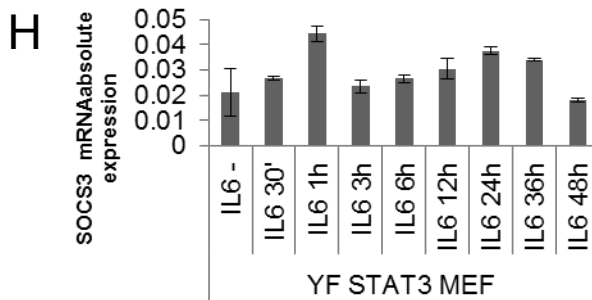

Supplement: NIHMS952969-supplement-Supl_figure_2.pdf [file NIHMS952969-supplement-Supl_figure_2.pdf]

**A**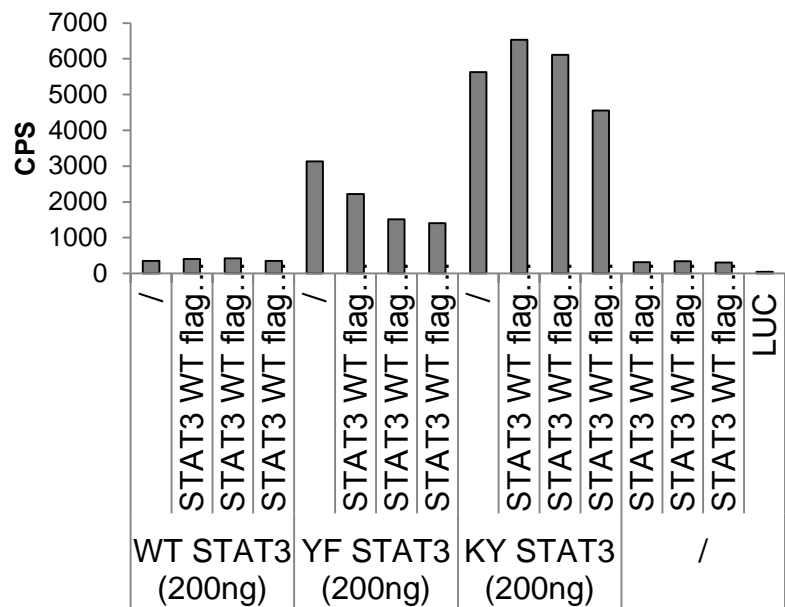**B**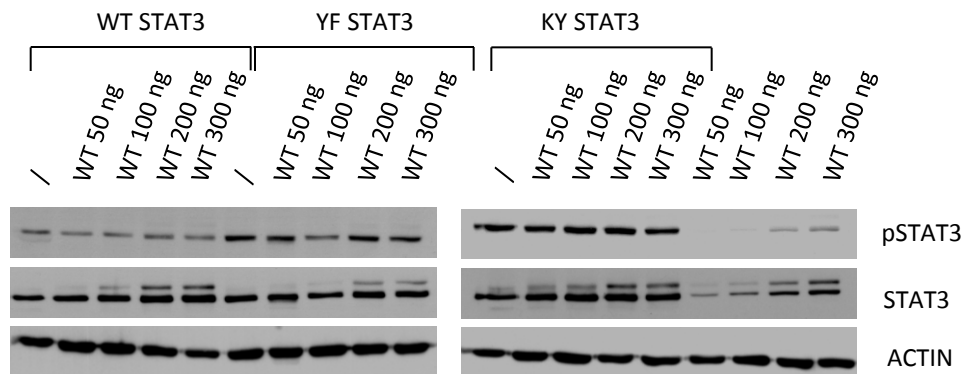**C**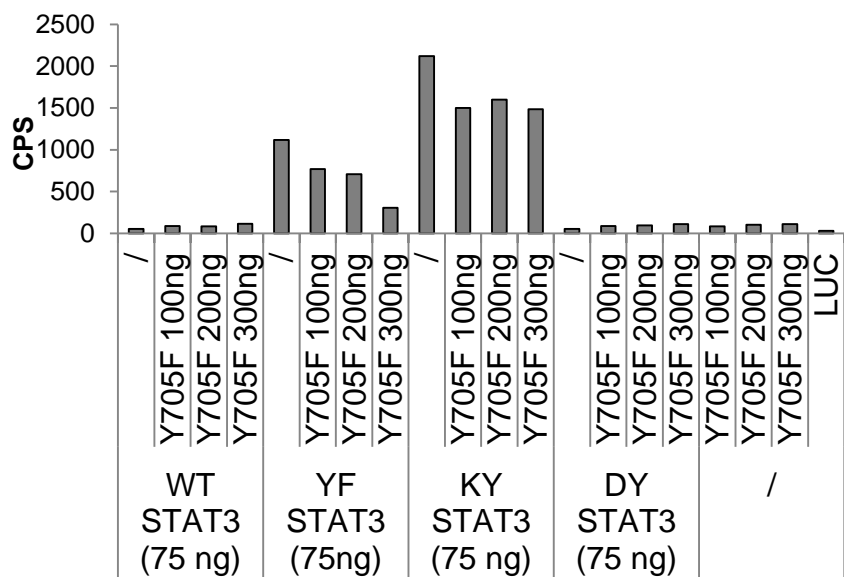**D**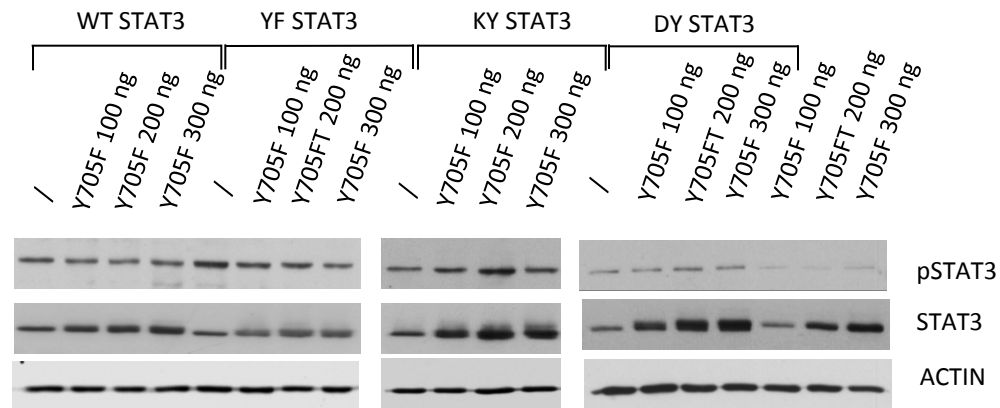

Supplement: NIHMS952969-supplement-Supl_figure_4.pdf [file NIHMS952969-supplement-Supl_figure_4.pdf]

A

TS TTA S3S

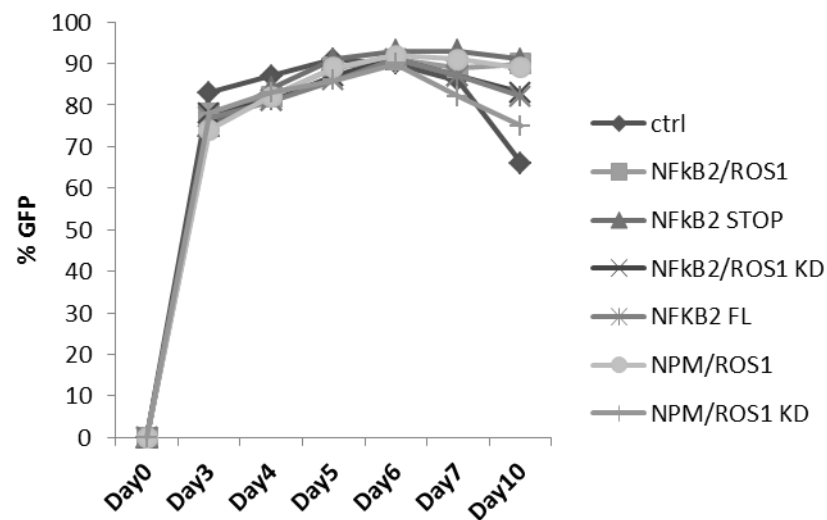

B

TS TTA A5

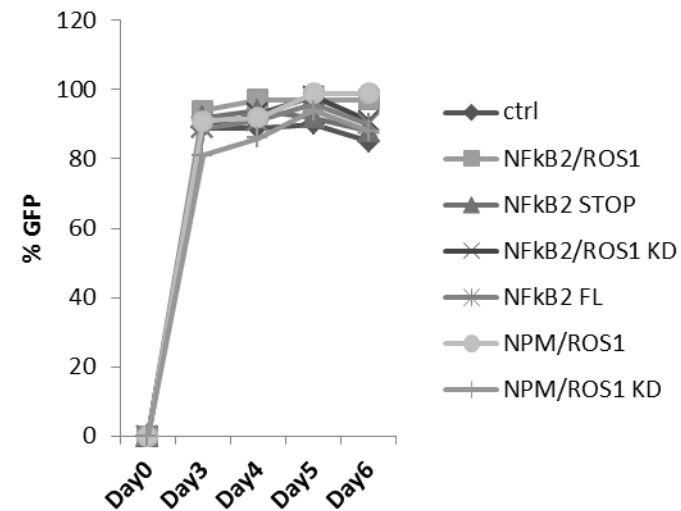

C

SU-DHL1 + CEP 28122 (nM for 12h)

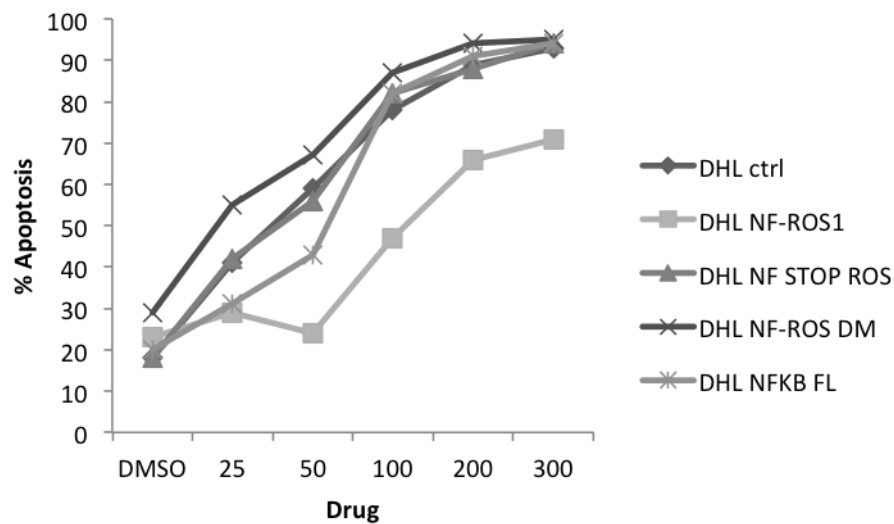

D

JB6 + CEP 28122 (nM for 72h)

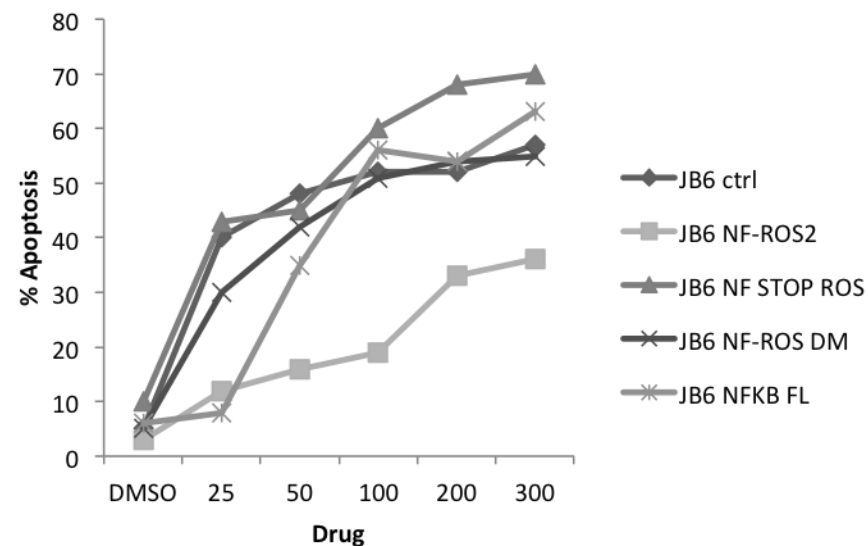

Supplement: NIHMS952969-supplement-Supl_figure_7.pdf [file NIHMS952969-supplement-Supl_figure_7.pdf]
